1 Copy number heterogeneity, large origin tandem repeats, and interspecies recombination  
2 in HHV-6A and HHV-6B reference strains

3

4 Alexander L. Greninger<sup>1,2,#</sup>, Pavitra Roychoudhury<sup>1,2</sup>, Negar Makhsous<sup>1</sup>, Derek Hanson<sup>3</sup>,  
5 Jill Chase<sup>5</sup>, Gerhard Krueger<sup>6</sup>, Hong Xie<sup>1</sup>, Meei-Li Huang<sup>1</sup>, Lindsay Saunders<sup>1</sup>, Dharam  
6 Ablashi<sup>5</sup>, David M. Koelle<sup>1,2,3,4</sup>, Linda Cook<sup>1</sup>, Keith R. Jerome<sup>1,2</sup>

7

8 <sup>1</sup>Department of Laboratory Medicine, University of Washington, Seattle, WA, USA

9 <sup>2</sup>Fred Hutchinson Cancer Research Institute, Seattle, WA, USA

10 <sup>3</sup>Department of Medicine, University of Washington, Seattle, WA, USA

11 <sup>4</sup>Department of Global Health, University of Washington, Seattle, WA, USA

12 <sup>5</sup>HHV-6 Foundation, Santa Barbara, CA, USA

13 <sup>6</sup>Department of Pathology and Laboratory Medicine, University of Houston, Houston,  
14 TX, USA

15 <sup>#</sup>Corresponding author: [agrening@uw.edu](mailto:agrening@uw.edu)

## 16 **Abstract**

17 Quantitative PCR is the diagnostic pillar for clinical virology testing, and  
18 reference materials are necessary for accurate, comparable quantitation between clinical  
19 laboratories. Accurate quantitation of HHV-6 is important for detection of viral  
20 reactivation and inherited chromosomally integrated HHV-6 in immunocompromised  
21 patients. Reference materials in clinical virology commonly consist of laboratory-  
22 adapted viral strains that may be affected by the culture process. We performed next-  
23 generation sequencing to make relative copy number measurements at single nucleotide  
24 resolution of eight candidate HHV-6A and seven HHV-6B reference strains and DNA  
25 materials from the HHV-6 Foundation and Advanced Biotechnologies. 11 of 17 (65%)  
26 HHV6 candidate reference materials showed multiple copies of the origin of replication  
27 upstream of the U41 gene by next-generation sequencing. These large tandem repeats  
28 arose independently in culture-adapted HHV-6A and HHV-6B strains, measuring 1254  
29 bp and 983 bp, respectively. Copy number measured between 4-10X copies relative to  
30 the rest of the genome. We also report the first interspecies recombinant HHV-6 strain  
31 with a HHV-6A GS backbone and >5.5kb region from HHV-6B Z29 from U41-U43 that  
32 covered the origin tandem repeat. Specific HHV-6A reference strains demonstrated  
33 duplication of regions at UL1/UL2, U87, and U89, as well as deletion in the U12-U24  
34 region and U94/95 genes. HHV-6 strains derived from cord blood mononuclear cells  
35 from different labs on different continents revealed no copy number differences  
36 throughout the viral genome. These data indicate large origin tandem duplications are an  
37 adaptation of both HHV-6A and HHV-6B in culture and show interspecies recombination  
38 is possible within the *Betaherpesvirinae*.

39 **Importance:**

40 Anything in science that needs to be quantitated requires a standard unit of measurement.

41 This includes viruses, for which quantitation increasingly determines definitions of

42 pathology and guidelines for treatment. However, the act of making standard or

43 reference material in virology can alter its very usefulness through genomic duplications,

44 insertions, and rearrangements. We used deep sequencing to examine candidate

45 reference strains for HHV-6, a ubiquitous human virus that can reactivate in the

46 immunocompromised population and is integrated into the human genome in every cell

47 of the body for 1% of people worldwide. We found large tandem repeats in the origin of

48 replication for both HHV-6A and HHV-6B that are selected for in culture. We also

49 found the first interspecies recombinant between HHV-6A and HHV-6B, a phenomenon

50 that is well-known in alphaherpesviruses but to date has not been seen in

51 betaherpesviruses. These data critically inform HHV-6 biology and the standard

52 selection process.

53

54 **Keywords:** human herpesvirus 6, HHV-6, HHV-6A, HHV-6B, copy number, secondary

55 standards, Z29, GS, origin of replication, origin, tandem repeat, nanopore, nanopore

56 sequencing, direct repeat, quantitative PCR

57

## 58 **Introduction**

59 Human herpesvirus 6A and 6B (HHV-6) are ubiquitous human viruses with  
60 human exposure levels >90% by the age of 2 years old as measured by serological assays  
61 performed worldwide (1, 2). Both HHV-6A and HHV-6B establish chronic infections in  
62 the majority of infected individuals, leading to asymptomatic persistent viral shedding (3,  
63 4). Exanthema subitum is the most common HHV-6 related infection seen after a primary  
64 exposure in 6 month to 3-year old children. Less frequently the virus can result in  
65 seizures, gastrointestinal and respiratory symptoms, thrombocytopenia, hepatitis, colitis,  
66 and CNS infections. Additionally, both HHV-6A and HHV-6B have been shown to  
67 integrate into host chromosomes in the telomere regions and be passed from parents to  
68 their children as inherited chromosomally integrated HHV-6 (iciHHV-6). The potential to  
69 measure HHV-6 from genomic DNA from these patients, as well as possible reactivation  
70 from the integrated HHV-6 make the diagnosis of HHV-6 infection from serum or  
71 plasma viral load testing challenging.

72 Accurate and sensitive real-time PCR assays that detect and quantify HHV-6 are  
73 critical to diagnosis and monitoring of the variety of manifestations of HHV-6 associated  
74 disease. Recently several quantitative cut-offs have been proposed that are associated  
75 with end-organ disease or iciHHV-6 status (5–7). There have been only a few limited  
76 studies comparing PCR methods between clinical labs (8–10). In addition, newer studies  
77 often utilize commercial reference laboratories or commercial reagents that in general do  
78 not make their primer/probe locations known. Of published studies where the PCR  
79 locations are described, many areas of the genome have been used, with no consistent  
80 location chosen. A review of the PCR methods used in 46 recent published papers (years

81 2014-2017) revealed the use of 17 different primer sets at multiple locations throughout  
82 the genome (at U6, 12, 13, 22, 27, 31, 32, 38, 41, 57, 65, 66, 67, 69, 90, 95, 100), with  
83 only the U31 and U65-66 primers used more than twice. Not surprisingly, this lack of  
84 consistency has contributed to a significant lack of consistency in test results as measured  
85 in cross-lab proficiency testing where quantitative differences as high as 4 logs have been  
86 seen (10, 11). These studies hint that between-lab results may be improved if diagnostic  
87 testing was done with a more limited number of high-performing primer sets. Finally,  
88 effective primer designs have been significantly limited by the lack of available DNA  
89 sequences.

90 Previous studies have identified the critical role that standardized materials play  
91 in the ability to establish clinical viral load cut-offs, establish assay sensitivity, and  
92 compare results between laboratories (10, 12–16). Efforts are currently underway at the  
93 National Institute for Biological Standards and Controls (NIBSC) in the United Kingdom  
94 to prepare WHO international standard material for both HHV-6A and 6B. However,  
95 since this effort utilizes cultured HHV-6 reference strains, it is unknown how well the  
96 materials utilized will reflect sequences in clinical isolates. Given the wide range of  
97 primer set locations used in labs, it is critical that the entire genome of any reference  
98 materials be studied

99 HHV-6A and -6B genomes have approximately 90% nucleotide identity to each  
100 other and about 50% similarity with the closest-related human betaherpesvirus, HHV-7.  
101 The genome is approximately 160-170 kb and contains many of the gene and regulatory  
102 elements present in the genome of other betaherpesviruses. Several prototypic strains of  
103 HHV-6 have been identified and utilized including GS, U1102, SIE, LHV, Z29, and

104 HST. Until very recently, there were fewer than 200 HHV-6 sequences in Genbank,  
105 including only 3 complete genomes. Recently, two large scale efforts have sequenced  
106 more than 150 near-full length HHV-6B genomes from four continents (17, 18).

107 In an effort to determine whether the available cultured “reference” strains have  
108 undergone significant changes during culture similar to that seen with the recently  
109 produced WHO BK and JC strains, we obtained 15 strains from the HHV-6 Foundation  
110 repository and used shotgun sequencing to obtain full-length genomes and estimate of  
111 copy number (19, 20). We found 9 of the 15 strains had high-copy tandem repeat  
112 amplifications in the origin of replication, including the first described origin  
113 amplification in an HHV-6A strain. We also describe the first HHV-6A/HHV-6B  
114 interspecies recombinant. Other HHV-6 reference materials had multiple loci with copy  
115 number variation of up to 20X. These duplications, deletions, and rearrangements may  
116 impact the utility of these strains for the production of standard materials for PCR testing.  
117 Changes in the genome of these strains in culture may have impact on the results of  
118 current and future studies utilizing these materials.

119

## 120 **Materials and Methods**

### 121 *HHV-6 reference strains and DNA materials*

122 HHV-6 culture isolates were obtained from the HHV-6 Foundation. The original  
123 HHV-6 isolate GS belongs to HHV-6A and was first isolated at the National Cancer  
124 Institute, NIH in 1986 from an AIDS patient. The HHV-6A GS strain was grown in  
125 HSB2, which is a human T-cell leukemic line derived from the peripheral blood of a  
126 child. The GS early passage isolate obtained from the HHV-6 Foundation is a low-

127 passaged HHV-6A GS isolate that was only passaged 4 times in cord blood mononuclear  
128 cells (CBMC). The GS early passage isolate was sequenced in 2013 after a brief  
129 expansion in CBMC and sequencing reads were obtained from L. Flamand (21). The  
130 HHV-6A DA strain was isolated at the NCI from a patient with chronic fatigue syndrome  
131 and was grown in the HSB2 cell line. The HHV-6A CO strains CO1, CO2, CO3, CO4,  
132 CO7 were isolated from patients with collagen vascular diseases including systemic  
133 lupus erythematosus, atypical polyclonal lymphoproliferation, rheumatoid arthritis, and  
134 unclassified collagen vascular disease (22). The HHV-6A SIE strain was isolated from  
135 an HIV-positive leukemia patient from the Ivory Coast and grown in PHA-stimulated  
136 CBMCs. The HHV-6B strains HST, KYO, ENO, and NAK were isolated from Japanese  
137 patients with exanthema subitum in 1988 (23). The HHV-6B MAR strain was originally  
138 obtained from an HIV-negative child born to an HIV-positive mother, and has been  
139 cultured in CBMCs (24). HHV-6B Z29 strain was originally isolated from an AIDS  
140 patients from Zaire and obtained from the HHV-6 Foundation stock deposited at the NIH  
141 AIDS repository and grown in the SupT1 cell line. Secondary HHV-6 standards  
142 comprising quantitated viral DNA from HHV-6A GS strain (08-945-250) and HHV-6B  
143 Z29 strain (08-923-00) were purchased from Advanced Biotechnologies Incorporated.  
144 Strains sequenced in this study are available in Table 1.

145

#### 146 *Illumina Sequencing Library Preparation*

147 DNA was extracted from culture isolates using the Zymo Viral DNA kit. DNA-  
148 sequencing libraries were prepared from 50 ng of genomic DNA using quarter-volumes  
149 of the Kapa HyperPrep kit with 7 minutes of fragmentation time and 12 cycles of dual-

150 indexed Truseq-adaptor PCR (18). Libraries were sequenced on 2x300bp, 1x190bp,  
151 and/or 1x192bp runs on an Illumina MiSeq. Sequences were quality- and adapter-  
152 trimmed, de novo assembled, and contigs were aligned to reference HHV-6A  
153 (NC\_001664) and HHV-6B (NC\_000898) genomes and visualized using Geneious v9.1.  
154 Read mapping for copy number analysis was performed using the Geneious read mapper  
155 with 10% allowed gaps per read, word length of 18, 20% maximum mismatches per read,  
156 and with structural variant, insertion, and gap finding allowed.

157

#### 158 *qPCR confirmation*

159 Quantitative PCR to estimate HHV-6 and beta-globin copy number in Table 1  
160 was performed using UL67-directed directed 5R primers (GTT AGG ATA TAC CGA  
161 TGT GCG TGA T/ FAM- TCC GAA ACA ACT GTC TGA CTG GCA AAA-TAMRA/  
162 TAC AGA TAC GGA GGC AAT AGA TTT G) (25) and beta-globin primers (TGA  
163 AGG CTC ATG GCA AGA AA/ FAM-TCC AGG TGA GCC AGG CCA TCA CTA-  
164 TAMRA/ GCT CAC TCA GTG TGG CAA AGG) respectively. Briefly each 30 ul PCR  
165 reaction contained 15 ul of 2x QuantiTect Multiplex PCR NoROX Master Mix (Qiagen),  
166 830 nM each primer, 250 nM probe, 0.267 ul Rox (Invitrogen), and 0.03 units UNG  
167 (Epicentre). EXO internal control , including template, primers and probe, was spiked  
168 into each PCR reaction to monitor PCR inhibition. QuantStudio 7 Flex Real-Time PCR  
169 system was used to perform PCR and signal detection. The PCR thermocycling  
170 conditions are as following: 50°C for 2 minutes, 95°C for 15 minutes and followed by 45  
171 cycles of 94°C for 1 minute and 60°C for 1 minute.



172 Quantitive PCR to estimate relative copy number between the origin of  
173 replication and HHV-6 U32 locus was performed in 20uL reactions using the  
174 SsoAdvanced Universal SYBR Green SuperMix. Ten-fold dilutions of DNA template  
175 from HHV-6 strains were tested using quantU32 F-R and species-specific origin primers  
176 (Table S1) using cycling conditions of 95C 30s and 40 cycles of 95C 5s and 60C 30s.  
177 For the U95 deletion in the CO strains, CO4 142970F-143228R primers (Table S1) were  
178 used in the same cycling conditions with SsoAdvanced Universal SYBR Green  
179 SuperMix, while the U32-targeting qPCR was performed with the U32 primers and a  
180 Taqman probe (Table S1) with the same cycling conditions.

181

#### 182 *PCR and Agilent TapeStation analysis*

183 PCR across the origin tandem repeat was performed using 1 ng of template  
184 genomic DNA in 20uL total volume reactions using 10pmol of each primer and the  
185 Phusion High-Fidelity DNA polymerase according to manufacturer's instructions. PCR  
186 primer sequences can be found in Table S1. PCR reactions were analyzed with the  
187 Genomic DNA ScreenTape assay on an Agilent 4200 TapeStation.

188

#### 189 *Amplification-free nanopore sequencing*

190 Nanopore libraries were created using the SQK-RAD002 kit tagmentation library  
191 preparation with 100ng of input total genomic DNA from the HHV-6B Z29 strain  
192 cultured in SupT1 cells. Amplification-free tagmented libraries were run according to  
193 Oxford Nanopore protocols v1.3.24 on a singular Mk1 (R9.4) FLO-MIN106 flow cell.

194 Nanopore reads were mapped to the HHV-6 Z29 reference genome (NC\_000898) using  
195 the LASTZ and Geneious aligners to screen for origin-containing reads (26, 27).

196

## 197 **Results**

198 *Large tandem repeats covering the origin of replication in both HHV-6A and HHV-6B*  
199 *strains*

200 In order to obtain single nucleotide resolution and copy number measurement for  
201 HHV-6 type strain reference materials, we sequenced a HHV-6A GS strain obtained from  
202 the HHV-6 Foundation and a HHV-6B Z29 strain obtained from the NIH AIDS  
203 repository. Libraries from the HHV-6 Z29 and GS strain were each prepared twice and  
204 sequenced to an average depth of 76X and 453X, respectively. The HHV-6B Z29 strain  
205 contained a homogeneous 983 bp long tandem repeat (Figure 1A). Copy number  
206 estimates based on relative coverage at the edge of the repeats across multiple library  
207 preparations indicated an average of 11-13 copies of the repeat present. Mapping of the  
208 edges of the Z29 origin tandem repeat gave different repeat breakpoints than previously  
209 described (28). All Z29 strains sequenced in this study had an additional 123 nucleotides  
210 at the 5' end of the repeat and extra 4 nucleotides at the 3' end of the repeat than the  
211 previously described repeat to make the 983 bp tandem repeat (28).

212 HHV-6A GS strain contained a heterogeneous tandem repeat that covered 1260  
213 bp of the HHV-6A reference genome (Figure 1B). Copy number estimates based on  
214 relative coverage at the edge of the repeats indicated an average of between 10-12 copies  
215 of the repeat present. The most common tandem repeat present included deletions of 193

216 bp and 2bp along with an insertion of 189 bp based on the HHV-6A reference genome,  
217 giving a mode length of 1254 bp.

218 To demonstrate that the copy number heterogeneity we found in the type strains  
219 of HHV-6 are also present in commercially available quantitative clinical reference  
220 materials, we also performed shotgun DNA sequencing on an HHV-6A GS strain and  
221 HHV-6B Z29 strain from Advanced Biotechnology Inc (ABI). These strains had similar  
222 tandem repeats in size at the origin of replication present in the GS strain obtained from  
223 the HHV-6 Foundation and Z29 strains obtained from NIH AIDS repository (Figure 1C).  
224 However, the Z29 origin tandem repeat in the commercial reference material was present  
225 at approximately twice the copy number observed in Z29 from the NIH AIDS repository.  
226 Intriguingly, the HHV-6A GS strain quantitative secondary standard material also  
227 contained a 4-fold increase in coverage covering the U90, U91, and the N-terminal two-  
228 thirds of the U86 gene. The U91 end of the repeat contained a complex rearrangement  
229 with the U100-DR intergenic region 266 nucleotides 5' of the beginning of the annotated  
230 DR repeat region. The HHV-6B Z29 secondary standard contained two large  
231 rearrangements -- one between U73 and R3 repeat region constituting 50% of DNA  
232 present and another between U86 and U95 representing 25% of DNA present. Thus,  
233 copy number of HHV-6B between U86 to R3 was 4-fold lower and between U73-U86  
234 and R3-U95 was 2-fold lower than the rest of the genome. Quantitative PCR analysis of  
235 origin and U32 loci confirmed deep sequencing data, demonstrating a 3-4 cycle earlier Ct  
236 for origin tandem repeat containing strains compared to strains lacking origin tandem  
237 repeats. Of note, an early passage GS strain had 3-fold fewer copies of the origin than

238 the later passage GS-HSB2 strain, consistent with what has been described previously in  
239 Z29 (28).

240 Previous analysis of 125 HHV-6B genomes obtained from clinical specimens  
241 revealed no tandem repeats across the origin of replication. To confirm the origin tandem  
242 repeat present in the HHV-6B Z29 strain, we performed PCR amplification and fragment  
243 analysis by gel electrophoresis across the sequence tandem repeat with two separate  
244 primer sets. As a control, we performed PCR across the origin of replication in a HHV-  
245 6B PCR-positive patient specimen. The patient specimen demonstrated a single copy of  
246 the locus present, while the Z29 strain contained an amplification ladder consistent with a  
247 population of virus with different numbers of multiple tandem repeats present at the locus  
248 (Figure 2A). We also performed amplification-free nanopore sequencing on DNA  
249 extracted from the HHV-6B Z29 strain in culture. Across 6,369 nanopore reads, we  
250 recovered two reads that contained more than one copy of the origin tandem repeat  
251 (Figure 2B). One read contained three tandem repeats of the origin repeat, while the  
252 other contained two repeats. Neither read spanned the entire tandem repeat.

253

#### 254 *Interspecies recombination between HHV-6A and HHV-6B in strain DA*

255 Whole genome sequencing of the HHV6 DA strain revealed a hybrid genome  
256 indicative of interspecies recombination between HHV-6A and HHV-6B strains. The  
257 DA strain genome overall showed closest sequence identity to HHV-6A than HHV-6B  
258 strains but included an oriLyt repeat that measured the exact length of the Z29 repeat at  
259 983 bp (Figure 3A). The DA strain U38 gene matched with perfect identity to the HHV-  
260 6A GS strain by BLASTN analysis. Of note, the DA strain origin-binding protein U73

261 gene matched closer to the HHV-6A U73 than HHV-6B U73 (99.5% versus 97.1%  
262 pairwise nucleotide identity to HHV-6A and HHV-6B reference strain genomes,  
263 respectively).

264 Analysis of the DA strain sequence yielded consensus recombination breakpoints  
265 at 67,314 bp and 72,667 bp of the NC\_001664 that were detected by six of seven  
266 recombination analysis programs (RDP4, GENECONV, Bootscan, MaxChi, Chimaera,  
267 and 3Seq) (Figure 3B). Reads mapped with near identity along a 5.5kb region of the  
268 HHV-6B Z29 reference genome between the 5' end of U41 and 3' end of U43 (68535-  
269 73824 bp of NC\_000898) (Figure 3C). Only a 61bp fragment with oriLyt repeat had 6  
270 variant sites to HHV-6B sequences and matched identically to the HHV-6A sequences in  
271 this (Figure 3D). These sequences were just 3' from the end of the minimal origin of  
272 DNA replication annotated in the HHV-6A reference genome. The length of the HHV-  
273 6B sequence present in the DA strain is likely considerably longer than the 5.5kb shown  
274 on the reference genome, due to the presence of the oriLyt repeat. Strain DA also  
275 contained a 33bp deletion in the 3' end of U79 gene that is not represented in either  
276 HHV-6A or HHV-6B reference sequences.

277

278 *Large deletions in U12-U24 genes and U94-U95 genes from two laboratory-adapted*  
279 *HHV-6A strains from collagen vascular disease*

280 Five HHV-6A strains isolates from patients with collagen vascular disease also  
281 grew to high copy number in HSB2 cells. Isolates CO1, CO2, and CO3 were cultured in  
282 primary peripheral blood lymphocytes for 17-21 days and then HSB2 cells for 4-5 days,  
283 while isolates CO4 and CO7 were cultured for 2 days in primary cells and 42-46 days in

284 HSB2 cells (22). The five CO isolates were highly similar with an average pairwise  
285 nucleotide identity of >99.9%, while all five isolates most closely aligned to HHV-6A  
286 isolate GS (KJ123690.1, 99.2% pairwise nucleotide identity). Both isolates CO4 and  
287 CO7 had 60% decreased coverage in a 13.5kb region from U12-U24 relative to the CO1-  
288 CO3 isolates (Figure 4A). Most notably, both isolates CO4 and CO7 also had 95% lower  
289 coverage over a 4.9kb region covering genes U94 and U95 relative to CO1-CO3 isolates.  
290 Equivalent relative copy number estimates for both the U95 locus and the origin of  
291 replication were recovered by qPCR (Figure 4B/C). Isolates CO4 and CO7 both had  
292 equivalent mixed variant allele frequencies at 25 loci based on read mapping to the UL  
293 region of the HHV-6A reference genome (NC\_001664) (Table S2). No other variants  
294 were isolated between the HHV-6 CO4 and CO7 strains, suggesting these strains are  
295 identical.

296

297 *HHV-6 strains isolated from PHA-stimulated cord blood mononuclear cells do not*  
298 *contain large tandem duplications or deletions*

299 To find the best secondary standard for HHV-6 clinical testing and to better  
300 understand the origin of the origin tandem repeat, we sequenced four HHV-6B and one  
301 HHV-6A strain that were isolated from PHA-stimulated cord blood mononuclear cells.  
302 Four HHV-6B strains (HST, ENO, KYO, NAK) were isolated from Japanese exanthem  
303 subitum patients, one HHV-6B strain (MAR) was isolated from an asymptomatic French  
304 child, and one HHV-6A strain (SIE) was isolated from an Ivory Coast patient with adult  
305 T-cell leukemia (23, 24, 29). Interestingly, all six strains contained minimal levels of  
306 copy number heterogeneity with an average coefficient of variation of coverage in the

307 unique long region of 21.0%, compared with 119% averaged over HHV-6A GS and  
308 HHV-6B Z29 type strains (Figure 5A). The lack of origin amplification in these CBMC-  
309 passaged strains was also confirmed by qPCR (Figure 5B). Without the tandem repeat in  
310 the origin, the only source of copy number differences in the cord blood mononuclear  
311 passaged strains was direct repeat coverage at two-thirds of that in the unique long  
312 region, consistent with active replication and sequencing of mostly HHV-6 concatemers  
313 (Figure 5A) (30). Of note, the decreased coverage in the direct repeat region relative to  
314 the unique long region was present in all strains sequenced in this study.

315

## 316 **Discussion**

317 We show the presence of copy number heterogeneity at multiple genomic loci  
318 across HHV-6A and HHV-6B culture isolates that are used as reference material for  
319 clinical assay development and normalization as well as basic science virology work.  
320 The most prominent copy number difference was a large tandem repeat in the origin of  
321 replication that was present in both HHV-6A and HHV-6B strains. The presence of  
322 large copy number differences in HHV-6A and HHV-6B strains was associated with  
323 passaged in immortalized cell lines, as strains passaged in primary cell lines and cord  
324 blood mononuclear cells did not carry genomic duplications and deletions and early  
325 passage virus contained fewer tandem repeats than late passage virus.

326 Recent analysis of 130 HHV-6B genomes and 10 icHHV-6A sequences spanning  
327 the U41 origin region revealed no large tandem repeats in the origin of replication among  
328 clinical isolates (18). Previous work had illustrated a large heterogeneous tandem repeat  
329 present at the oriLyt in HHV-6B Z29 strains that was associated with higher passage

330 number (28). Our data illustrate that this is a general feature of HHV-6 and that a  
331 heterogeneous larger tandem repeat is also present in multiple laboratory adapted HHV-  
332 6A strains at the oriLyt. We show that increased culture passage in immortalized cell  
333 lines is associated with reduced copy number of two large genomic loci in HHV-6A CO  
334 strains. Copy number variability at multiple genomic loci was also reflected in HHV-6A  
335 reference material that is used to normalize quantitative values for clinical assay  
336 development. Interestingly, no HHV-6 isolate from cord blood mononuclear cells  
337 showed tandem repeats, despite growing to high titer. These isolates may provide the  
338 best material for HHV-6 standards development.

339 We also show the first genomic evidence of interspecies recombination between  
340 HHV-6A and HHV-6B strains along a >5.5 kb segment containing the oriLyt and U42  
341 gene as well as portions of the U41 and U43 genes. Interspecies recombination is a  
342 relatively common feature of the alphaherpesviruses HSV-1 and HSV-2 but has not been  
343 described for any other human herpesviruses (31). Our results for DA strain  
344 recombination are most consistent with a model in which co-cultivation of an HHV-6A  
345 GS strain with a laboratory-adapted HHV-6B Z29 strain with oriLyt repeat that resulted  
346 in recombination between the two strains. Interestingly the recombinant strain also  
347 showed HHV-6A-like sequence in its HHV-6B oriLyt tandem repeat. Although this  
348 sequence fell outside the minimal origin of replication, it is suggestive that the oriLyt  
349 tandem repeat sequence may have evolved to more effectively interact with HHV-6A  
350 replication proteins contained in the rest of genome. No specific HHV-6B-like sequences  
351 were found in the DA strain U73 origin binding protein to indicate reciprocal U73  
352 evolution to match the HHV-6B-like origin sequences. Recent analysis of 140 HHV-6



353 genomes from clinical and icHHV-6 isolates revealed no evidence of interspecies  
354 recombination but widespread intraspecies recombination (18). Whether interspecies  
355 recombination has occurred in clinical strains of HHV-6 remains to be determined.  
356 However the high sequence similarity between HHV-6A and HHV-6B and the frequency  
357 of alphaherpesvirus recombination suggests that as more sequencing is performed, HHV-  
358 6A and HHV-6B recombinants may be found in nature.

359 Previous work from our group had demonstrated the loss of almost one-third of  
360 the BK and JC polyomavirus genome in up to 90% of viral species present in multiple  
361 viral stocks including a WHO international standard, likely due to viral passage in SV40  
362 T-antigen immortalized cell lines (19, 20). While clinical PCR tests for HHV-6 are  
363 unlikely to target the oriLyt region, normalization of quantitative clinical HHV-6 testing  
364 to any of the loci here found at increased or decreased copy number could affect  
365 quantitation, not least because multiple viral populations were present in many of the  
366 reference materials tested. We also found several examples where contamination with  
367 another HHV-6 strain most parsimoniously explained our sequencing results. We  
368 continue to recommend the use of next-generation sequencing to obtain genome-wide  
369 single nucleotide resolution copy number measurements in order to validate viral  
370 reference materials used in clinical virology and basic sciences labs across the world.

371

372 Accessions: These sequences are available in NCBI Genbank (MF994813-MF994829)  
373 and associated with BioProject 338014.

374

375 **Figure Legends**

376 **Figure 1** – Representative coverage maps of HHV-6B Z29 and HHV-6A GS reference  
377 strains. Shotgun DNA sequencing reads from cultured virus were mapped to the NCBI  
378 HHV-6 reference genomes, NC\_000898 and NC\_001664, respectively. A) HHV-6B  
379 Z29 strain yielded a homogeneous 983 bp tandem repeat that was present at  
380 approximately 12.5X higher coverage of the rest of genome. Sequences at 5' and 3' end  
381 of the tandem repeat in Z29 strain are depicted and are different than those indicated in  
382 original paper (28). B) HHV-6A GS strain yielded a heterogeneous 1254 bp tandem  
383 repeat that was present at approximately 11.4X higher coverage than the rest of the  
384 genome. Sequences at 5' and 3' end of the heterogeneous tandem repeat in GS strain are  
385 depicted. C) ABI Quantitative DNA material for HHV-6A GS and HHV-6B Z29 also  
386 demonstrates a similar origin tandem repeat with additional loci with copy number  
387 differences in the GS strain. Long-distance rearrangements between U73-R3, U86-U95,  
388 and U91-U100/DR intergenic region are noted by arching dotted lines and the estimated  
389 viral subpopulation containing the indicated deletion is indicated by the % value. D)  
390 qPCR analysis of U32 and origin loci on 10-fold dilutions of DNA from HHV-6A and 6B  
391 strains confirms deep sequencing estimates of relative copy number. Equivalent Cts for  
392 the PCR results of HST/MT4 indicate an equal amount of amplification from the 2 sites  
393 with that strain. All other strains show increased amplification with the Origin PCR,  
394 indicating additional copies of the origin present in the genome. Of note, an early  
395 passage GS strain showed 3-fold less amplification of the origin by qPCR compared to  
396 the later passage GS-HSB2 strain.

397

398 **Figure 2** – Validation of Z29 origin tandem repeat with PCR and nanopore sequencing.

399 A) PCR-TapeStation analysis of tandem repeat in origin of Z29 strain with two PCR  
400 primer pairs. B) Amplification free-nanopore sequencing yielded two nanopore reads  
401 that align across the origin tandem repeat and carry at least 2 and 3 copies of the repeat.  
402 No reads that spanned both ends of the tandem repeat were recovered.

403

404 **Figure 3** – HHV-6A DA strain shows genomic evidence of interspecies recombination  
405 between HHV-6A and HHV-6B strains. A) Tandem repeat of the origin for DA strain  
406 shows Z29-like length of 983 bp. B) RDP4 scan recombination analysis demonstrates  
407 two breakpoints recombination breakpoints at nucleotide 67,194 and 72,681 of the HHV-  
408 6A DA genome C) Mapping of reads to HHV-6B Z29 reference genome at U41 locus  
409 with mismatches highlighted. D) Nucleotide sequence of 61bp region of tandem repeat  
410 that most closely matches HHV-6A reference genome (NC\_001664). E) Phylogenetic  
411 tree analysis of recombination region supports HHV-6B-like nature of U41 locus.

412

413 **Figure 4** – HHV-6A CO strains from patients with collagen vascular diseases show  
414 several copy number differences. A) Coverage maps from five HHV-6A strains isolated  
415 from different patients with collagen vascular diseases are displayed (22). These strains  
416 all showed a similar heterogeneous tandem repeat that gave a mode length of 1254 bp.  
417 Strains CO4 and CO7 which were passaged >40 times in immortalized HSB2 cell lines  
418 also demonstrated 60% and 95% lower coverage in U12-U24 and U94-U95 regions,  
419 respectively. Of note, these two strains also shared identical sequence and minor allele  
420 distribution, consistent with being the same strain. B/C) qPCR analysis of ten-fold

421 dilutions of DNA from the HHV-6A CO strains at the U32, U95, and origin loci confirms  
422 relative copy number estimates from deep sequencing data.

423

424 **Figure 5** – HHV-6A and -6B strains sequenced from PHA-activated cord blood

425 mononuclear cells reveal no major copy number differences. Coverage maps from four  
426 HHV-6B strains from Japan (NAK, KYO, ENO, HST), one HHV-6B strain from France  
427 (MAR), and one HHV-6A strain from Ivory Coast (SIE) are displayed. The only copy  
428 number difference in these strains is the reduced coverage in the direct repeat region due  
429 to sequencing of likely concatemeric HHV-6, which was present in all strain sequenced  
430 in this study. B) qPCR analysis of ten-fold dilutions of DNA from the CBMC passaged  
431 HHV-6 strains at the U32 and origin loci confirms relative copy number estimates from  
432 deep sequencing data.

433

434

435 **Table 1** – Summary of HHV-6 strains sequenced in this study.

436 **References**

- 437 1. Salahuddin SZ, Ablashi DV, Markham PD, Josephs SF, Sturzenegger S, Kaplan M,  
438 Halligan G, Biberfeld P, Wong-Staal F, Kramarsky B. 1986. Isolation of a new virus,  
439 HBLV, in patients with lymphoproliferative disorders. *Science* 234:596–601.
- 440 2. Ablashi D, Agut H, Alvarez-Lafuente R, Clark DA, Dewhurst S, DiLuca D, Flamand  
441 L, Frenkel N, Gallo R, Gompels UA, Höllsberg P, Jacobson S, Luppi M, Lusso P,  
442 Malnati M, Medveczky P, Mori Y, Pellett PE, Pritchett JC, Yamanishi K, Yoshikawa  
443 T. 2014. Classification of HHV-6A and HHV-6B as distinct viruses. *Arch Virol*  
444 159:863–870.
- 445 3. Fillet AM, Raphael M, Visse B, Audouin J, Poirel L, Agut H. 1995. Controlled study  
446 of human herpesvirus 6 detection in acquired immunodeficiency syndrome-  
447 associated non-Hodgkin’s lymphoma. The French Study Group for HIV-Associated  
448 Tumors. *J Med Virol* 45:106–112.
- 449 4. Cone RW, Huang ML, Hackman RC, Corey L. 1996. Coinfection with human  
450 herpesvirus 6 variants A and B in lung tissue. *J Clin Microbiol* 34:877–881.
- 451 5. Boutolleau D, Fernandez C, André E, Imbert-Marcille B-M, Milpied N, Agut H,  
452 Gautheret-Dejean A. 2003. Human herpesvirus (HHV)-6 and HHV-7: two closely  
453 related viruses with different infection profiles in stem cell transplantation recipients.  
454 *J Infect Dis* 187:179–186.
- 455 6. Hill JA, Magaret AS, Hall-Sedlak R, Mikhaylova A, Huang M-L, Sandmaier BM,  
456 Hansen JA, Jerome KR, Zerr DM, Boeckh M. 2017. Outcomes of hematopoietic cell

- 457 transplantation using donors or recipients with inherited chromosomally integrated  
458 HHV-6. *Blood* 130:1062–1069.
- 459 7. Ogata M, Kikuchi H, Satou T, Kawano R, Ikewaki J, Kohno K, Kashima K, Ohtsuka  
460 E, Kadota J-I. 2006. Human herpesvirus 6 DNA in plasma after allogeneic stem cell  
461 transplantation: incidence and clinical significance. *J Infect Dis* 193:68–79.
- 462 8. Flamand L, Gravel A, Boutolleau D, Alvarez-Lafuente R, Jacobson S, Malnati MS,  
463 Kohn D, Tang Y-W, Yoshikawa T, Ablashi D. 2008. Multicenter comparison of PCR  
464 assays for detection of human herpesvirus 6 DNA in serum. *J Clin Microbiol*  
465 46:2700–2706.
- 466 9. Karlsson T, Mannonen L, Loginov R, Lappalainen M, Höckerstedt K, Lautenschlager  
467 I. 2012. Development of a new quantitative real-time HHV-6-PCR and monitoring of  
468 HHV-6 DNAemia after liver transplantation. *J Virol Methods* 181:25–36.
- 469 10. Hayden RT, Sun Y, Tang L, Procop GW, Hillyard DR, Pinsky BA, Young SA,  
470 Caliendo AM. 2017. Progress in Quantitative Viral Load Testing: Variability and  
471 Impact of the WHO Quantitative International Standards. *J Clin Microbiol* 55:423–  
472 430.
- 473 11. de Pagter PJ, Schuurman R, de Vos NM, Mackay W, van Loon AM. 2010.  
474 Multicenter external quality assessment of molecular methods for detection of human  
475 herpesvirus 6. *J Clin Microbiol* 48:2536–2540.
- 476 12. Hayden RT, Shahbazian MD, Valsamakis A, Boonyaratanakornkit J, Cook L, Pang  
477 XL, Preiksaitis JK, Schönbrunner ER, Caliendo AM. 2013. Multicenter evaluation of

- 478 a commercial cytomegalovirus quantitative standard: effects of commutability on  
479 interlaboratory concordance. *J Clin Microbiol* 51:3811–3817.
- 480 13. Hayden RT, Yan X, Wick MT, Rodriguez AB, Xiong X, Ginocchio CC, Mitchell MJ,  
481 Caliendo AM, College of American Pathologists Microbiology Resource Committee.  
482 2012. Factors contributing to variability of quantitative viral PCR results in  
483 proficiency testing samples: a multivariate analysis. *J Clin Microbiol* 50:337–345.
- 484 14. Hayden RT, Preiksaitis J, Tong Y, Pang X, Sun Y, Tang L, Cook L, Pounds S, Fryer  
485 J, Caliendo AM. 2015. Commutability of the First World Health Organization  
486 International Standard for Human Cytomegalovirus. *J Clin Microbiol* 53:3325–3333.
- 487 15. Madej RM, Davis J, Holden MJ, Kwang S, Labourier E, Schneider GJ. 2010.  
488 International standards and reference materials for quantitative molecular infectious  
489 disease testing. *J Mol Diagn JMD* 12:133–143.
- 490 16. Holden MJ, Madej RM, Minor P, Kalman LV. 2011. Molecular diagnostics:  
491 harmonization through reference materials, documentary standards and proficiency  
492 testing. *Expert Rev Mol Diagn* 11:741–755.
- 493 17. Zhang E, Bell AJ, Wilkie GS, Suárez NM, Batini C, Veal CD, Armendáriz-Castillo I,  
494 Neumann R, Cotton VE, Huang Y, Porteous DJ, Jarrett RF, Davison AJ, Royle NJ.  
495 2017. Inherited chromosomally integrated human herpesvirus 6 genomes are ancient,  
496 intact and potentially able to reactivate from telomeres. *J Virol JVI*.01137-17.
- 497 18. Greninger A, Knudsen G, Roychoudhury P, Hanson D, Sedlak RAH, Xie H, Guan J,  
498 Nguyen T, Peddu V, Boeckh M, Huang M-L, Cook L, Depledge D, Zerr D, Koelle D,

- 499 Gantt S, Yoshikawa T, Caserta M, Hill J, Jerome K. 2017. Genomic and proteomic  
500 analysis of Human herpesvirus 6 reveals distinct clustering of acute versus inherited  
501 forms and reannotation of reference strain. bioRxiv 181248.
- 502 19. Greninger AL, Bateman AC, Atienza EE, Wendt S, Makhsous N, Jerome KR, Cook  
503 L. 2017. Copy Number Heterogeneity of JC Virus Standards. J Clin Microbiol  
504 55:824–831.
- 505 20. Bateman AC, Greninger A, Atienza EE, Jerome KR, Cook L. 2017. Quantification of  
506 BK Virus Standards by Quantitative Real-time PCR and Droplet Digital PCR is  
507 Confounded by Multiple Virus Populations in the WHO BKV International Standard.  
508 Clin Chem Press.
- 509 21. Gravel A, Ablashi D, Flamand L. 2013. Complete Genome Sequence of Early  
510 Passaged Human Herpesvirus 6A (GS Strain) Isolated from North America. Genome  
511 Announc 1.
- 512 22. Krueger GR, Sander C, Hoffmann A, Barth A, Koch B, Braun M. 1991. Isolation of  
513 human herpesvirus-6 (HHV-6) from patients with collagen vascular diseases. Vivo  
514 Athens Greece 5:217–225.
- 515 23. Yamanishi K, Okuno T, Shiraki K, Takahashi M, Kondo T, Asano Y, Kurata T.  
516 1988. Identification of human herpesvirus-6 as a causal agent for exanthem subitum.  
517 Lancet Lond Engl 1:1065–1067.
- 518 24. Aubin JT, Collandre H, Candotti D, Ingrand D, Rouzioux C, Burgard M, Richard S,  
519 Huraux JM, Agut H. 1991. Several groups among human herpesvirus 6 strains can be



- 520 distinguished by Southern blotting and polymerase chain reaction. *J Clin Microbiol*  
521 29:367–372.
- 522 25. Zerr DM, Yeung LC, Obrigewitch RM, Huang M-L, Frenkel LM, Corey L. 2002.  
523 Primary human herpesvirus-6 associated with an afebrile seizure in a 3-week-old  
524 infant. *J Med Virol* 66:384–387.
- 525 26. Greninger AL, Naccache SN, Federman S, Yu G, Mbala P, Bres V, Stryke D,  
526 Bouquet J, Somasekar S, Linnen JM, Dodd R, Mulembakani P, Schneider BS,  
527 Muyembe-Tamfum J-J, Stramer SL, Chiu CY. 2015. Rapid metagenomic  
528 identification of viral pathogens in clinical samples by real-time nanopore sequencing  
529 analysis. *Genome Med* 7:99.
- 530 27. Kearse M, Moir R, Wilson A, Stones-Havas S, Cheung M, Sturrock S, Buxton S,  
531 Cooper A, Markowitz S, Duran C, Thierer T, Ashton B, Meintjes P, Drummond A.  
532 2012. Geneious Basic: an integrated and extendable desktop software platform for the  
533 organization and analysis of sequence data. *Bioinforma Oxf Engl* 28:1647–1649.
- 534 28. Stamey FR, Dominguez G, Black JB, Dambaugh TR, Pellett PE. 1995. Intragenomic  
535 linear amplification of human herpesvirus 6B oriLyt suggests acquisition of oriLyt by  
536 transposition. *J Virol* 69:589–596.
- 537 29. Agut H, Guetard D, Collandre H, Dauguet C, Montagnier L, Miclea JM, Baumann  
538 H, Gessain A. 1988. Concomitant infection by human herpesvirus 6, HTLV-I, and  
539 HIV-2. *Lancet Lond Engl* 1:712.

- 540 30. Prusty BK, Krohne G, Rudel T. 2013. Reactivation of Chromosomally Integrated  
541 Human Herpesvirus-6 by Telomeric Circle Formation. *PLOS Genet* 9:e1004033.
- 542 31. Koelle DM, Norberg P, Fitzgibbon MP, Russell RM, Greninger AL, Huang M-L,  
543 Stensland L, Jing L, Magaret AS, Diem K, Selke S, Xie H, Celum C, Lingappa JR,  
544 Jerome KR, Wald A, Johnston C. 2017. Worldwide circulation of HSV-2  $\times$  HSV-1  
545 recombinant strains. *Sci Rep* 7:44084.
- 546

Table 1. Strains sequenced with qPCR results and Sequencing Reads

| Species | Strain          | Cell Line           | HHV-6 quantity | beta-globin quantity | Trimmed Reads | HHV-6 Reads | Accession                                                                           |
|---------|-----------------|---------------------|----------------|----------------------|---------------|-------------|-------------------------------------------------------------------------------------|
| HHV-6A  | GS              | HSB2                | 1.94E+06       | 5.38E+03             | 2091792       | 47508       | MF994822<br>KC465951 (sequenced in PMID 23766398<br>received reads from L. Flamand) |
|         | GS-early        | CBMC                | 6.57E+01       | 1.36E+03             | 308104        | 66878       |                                                                                     |
|         | DA              | HSB2                | 9.17E+06       | 5.39E+04             | 3787217       | 30508       | MF994820                                                                            |
|         | CO-1            | HSB2                | 3.04E+07       | 1.51E+04             | 1913207       | 164835      | MF994815                                                                            |
|         | CO-2            | HSB2                | 2.07E+07       | 8.04E+03             | 1278582       | 118403      | MF994816                                                                            |
|         | CO-3            | HSB2                | 4.20E+06       | 3.25E+03             | 896950        | 54464       | MF994817                                                                            |
|         | CO-4            | HSB2                | 2.47E+06       | 1.70E+03             | 6692042       | 42596       | MF994818                                                                            |
|         | CO-7            | HSB2                | 1.61E+06       | 1.04E+03             | 10887157      | 54046       | MF994819                                                                            |
|         | SIE             | PHA-stimulated CBMC | 2.05E+07       | 2.19E+04             | 1015200       | 49307       | MF994828                                                                            |
|         | ABI-HHV6A (GS)  | unknown             | 2.26E+04       | 2.18E+01             | 1644798       | 225145      | MF994813                                                                            |
| HHV-6B  | Z29             | SupT1               | 1.89E+05       | 1.54E+03             | 2436488       | 62770       | MF994829                                                                            |
|         | HST             | MT4                 | 4.10E+05       | 5.70E+03             | 10666502      | 28251       | MF994824                                                                            |
|         | HST             | PHA-stimulated CBMC | 1.12E+06       | 2.82E+03             | 1155336       | 29365       | MF994823                                                                            |
|         | KYO             | PHA-stimulated CBMC | 1.56E+06       | 3.28E+03             | 949314        | 28626       | MF994825                                                                            |
|         | ENO             | PHA-stimulated CBMC | 1.74E+06       | 7.00E+03             | 1116480       | 39004       | MF994821                                                                            |
|         | MAR             | PHA-stimulated CBMC | 1.18E+07       | 1.97E+04             | 801650        | 26594       | MF994826                                                                            |
|         | NAK             | PHA-stimulated CBMC | 1.29E+05       | 6.88E+02             | 5617132       | 42955       | MF994827                                                                            |
|         | ABI-HHV6B (Z29) | unknown             | 1.16E+03       | Undetectable         | 1200052       | 112632      | MF994814                                                                            |

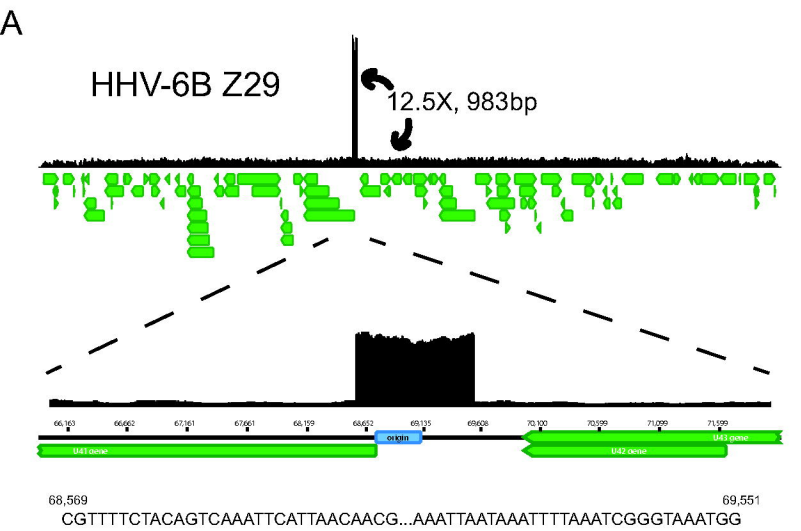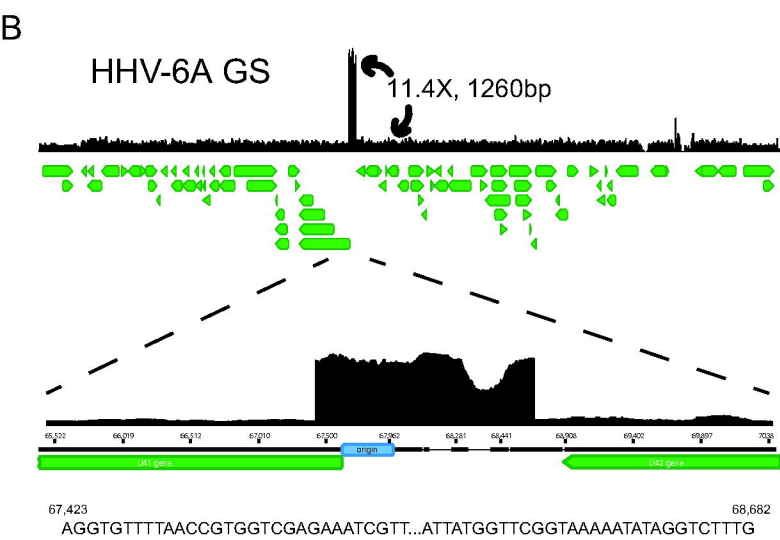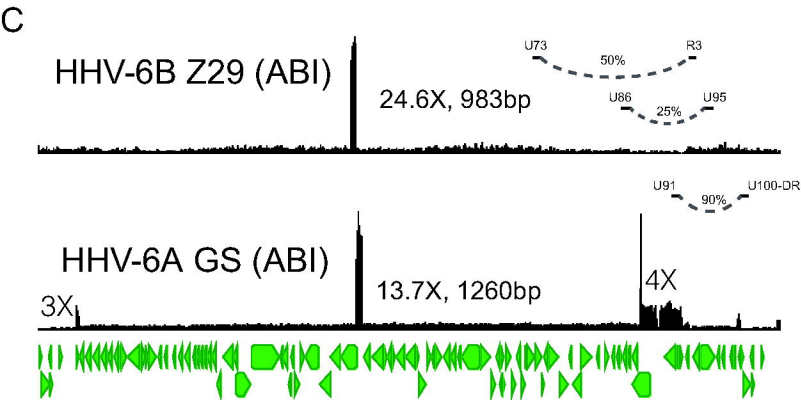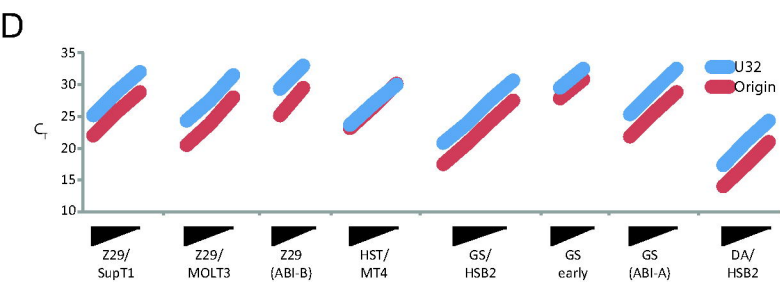

A

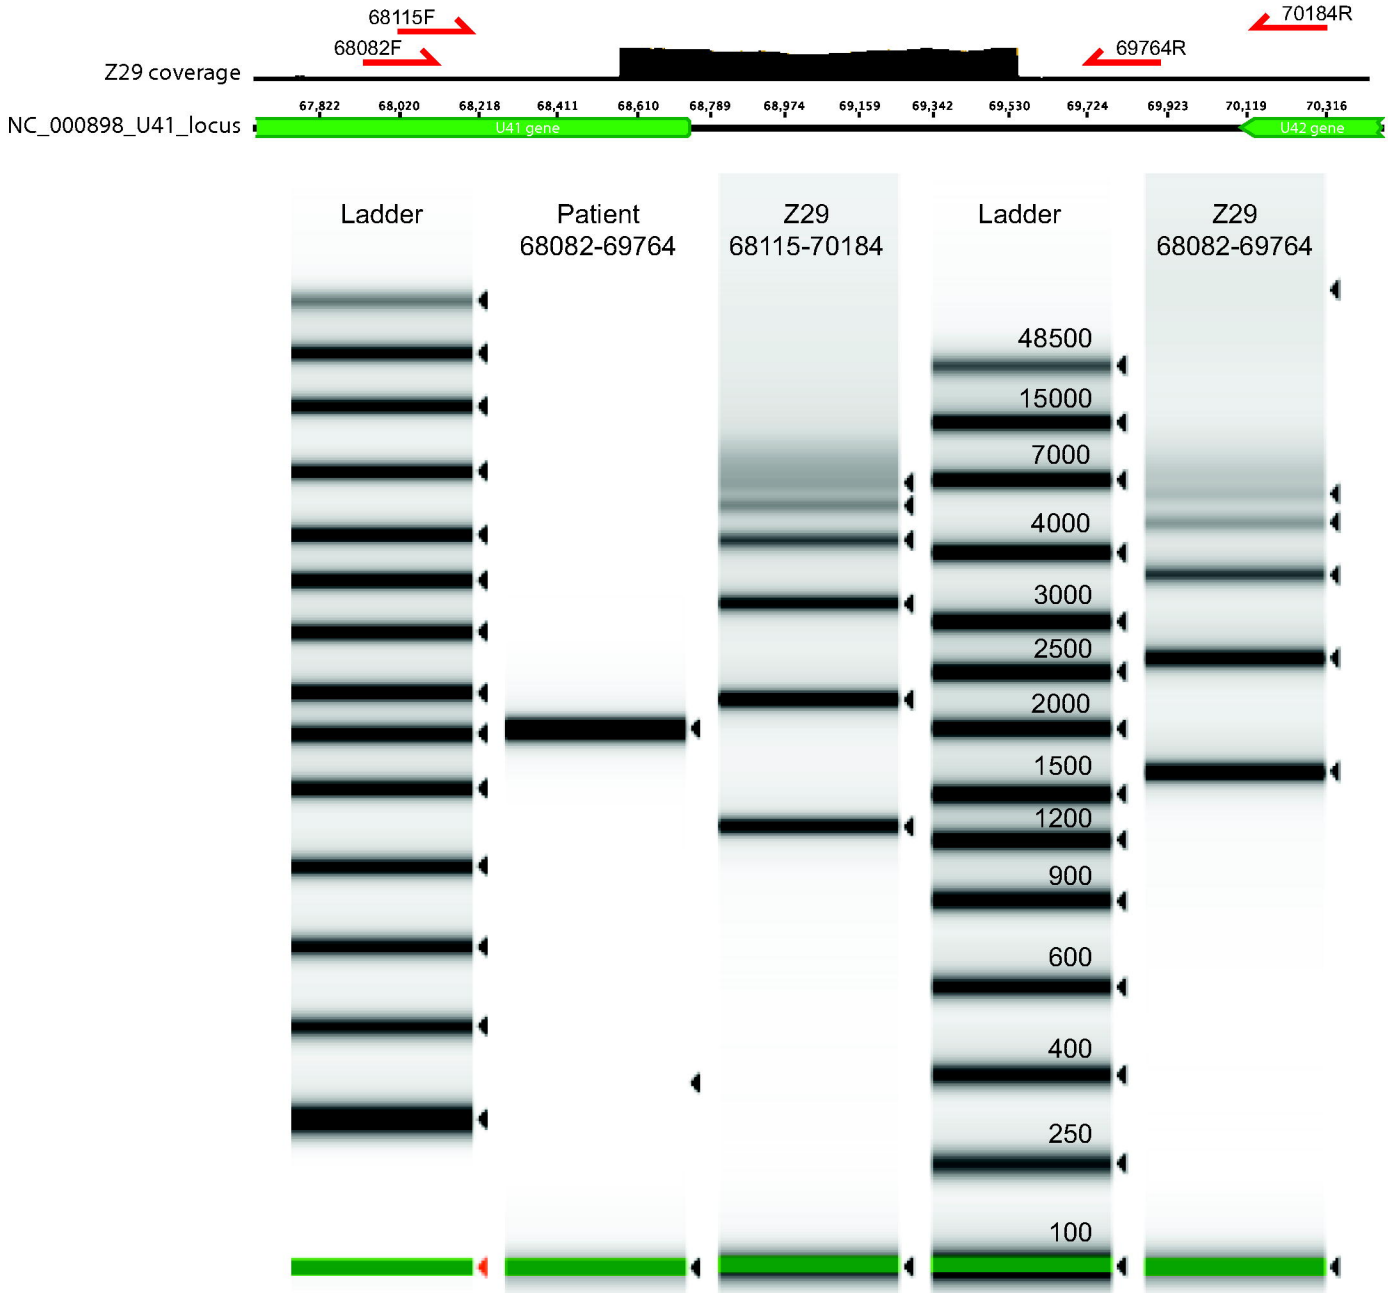

B

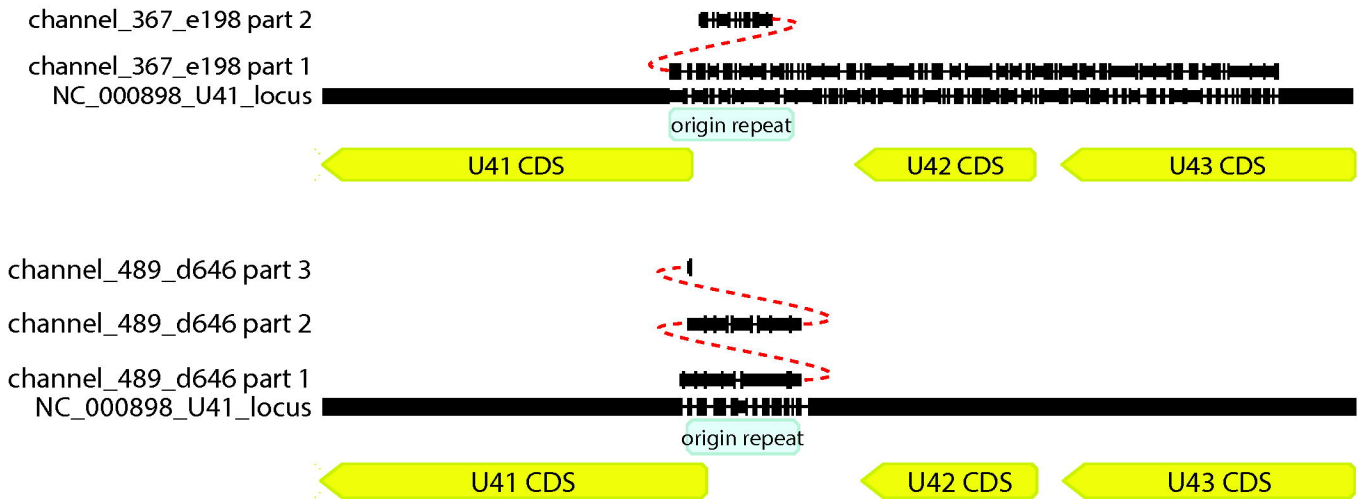

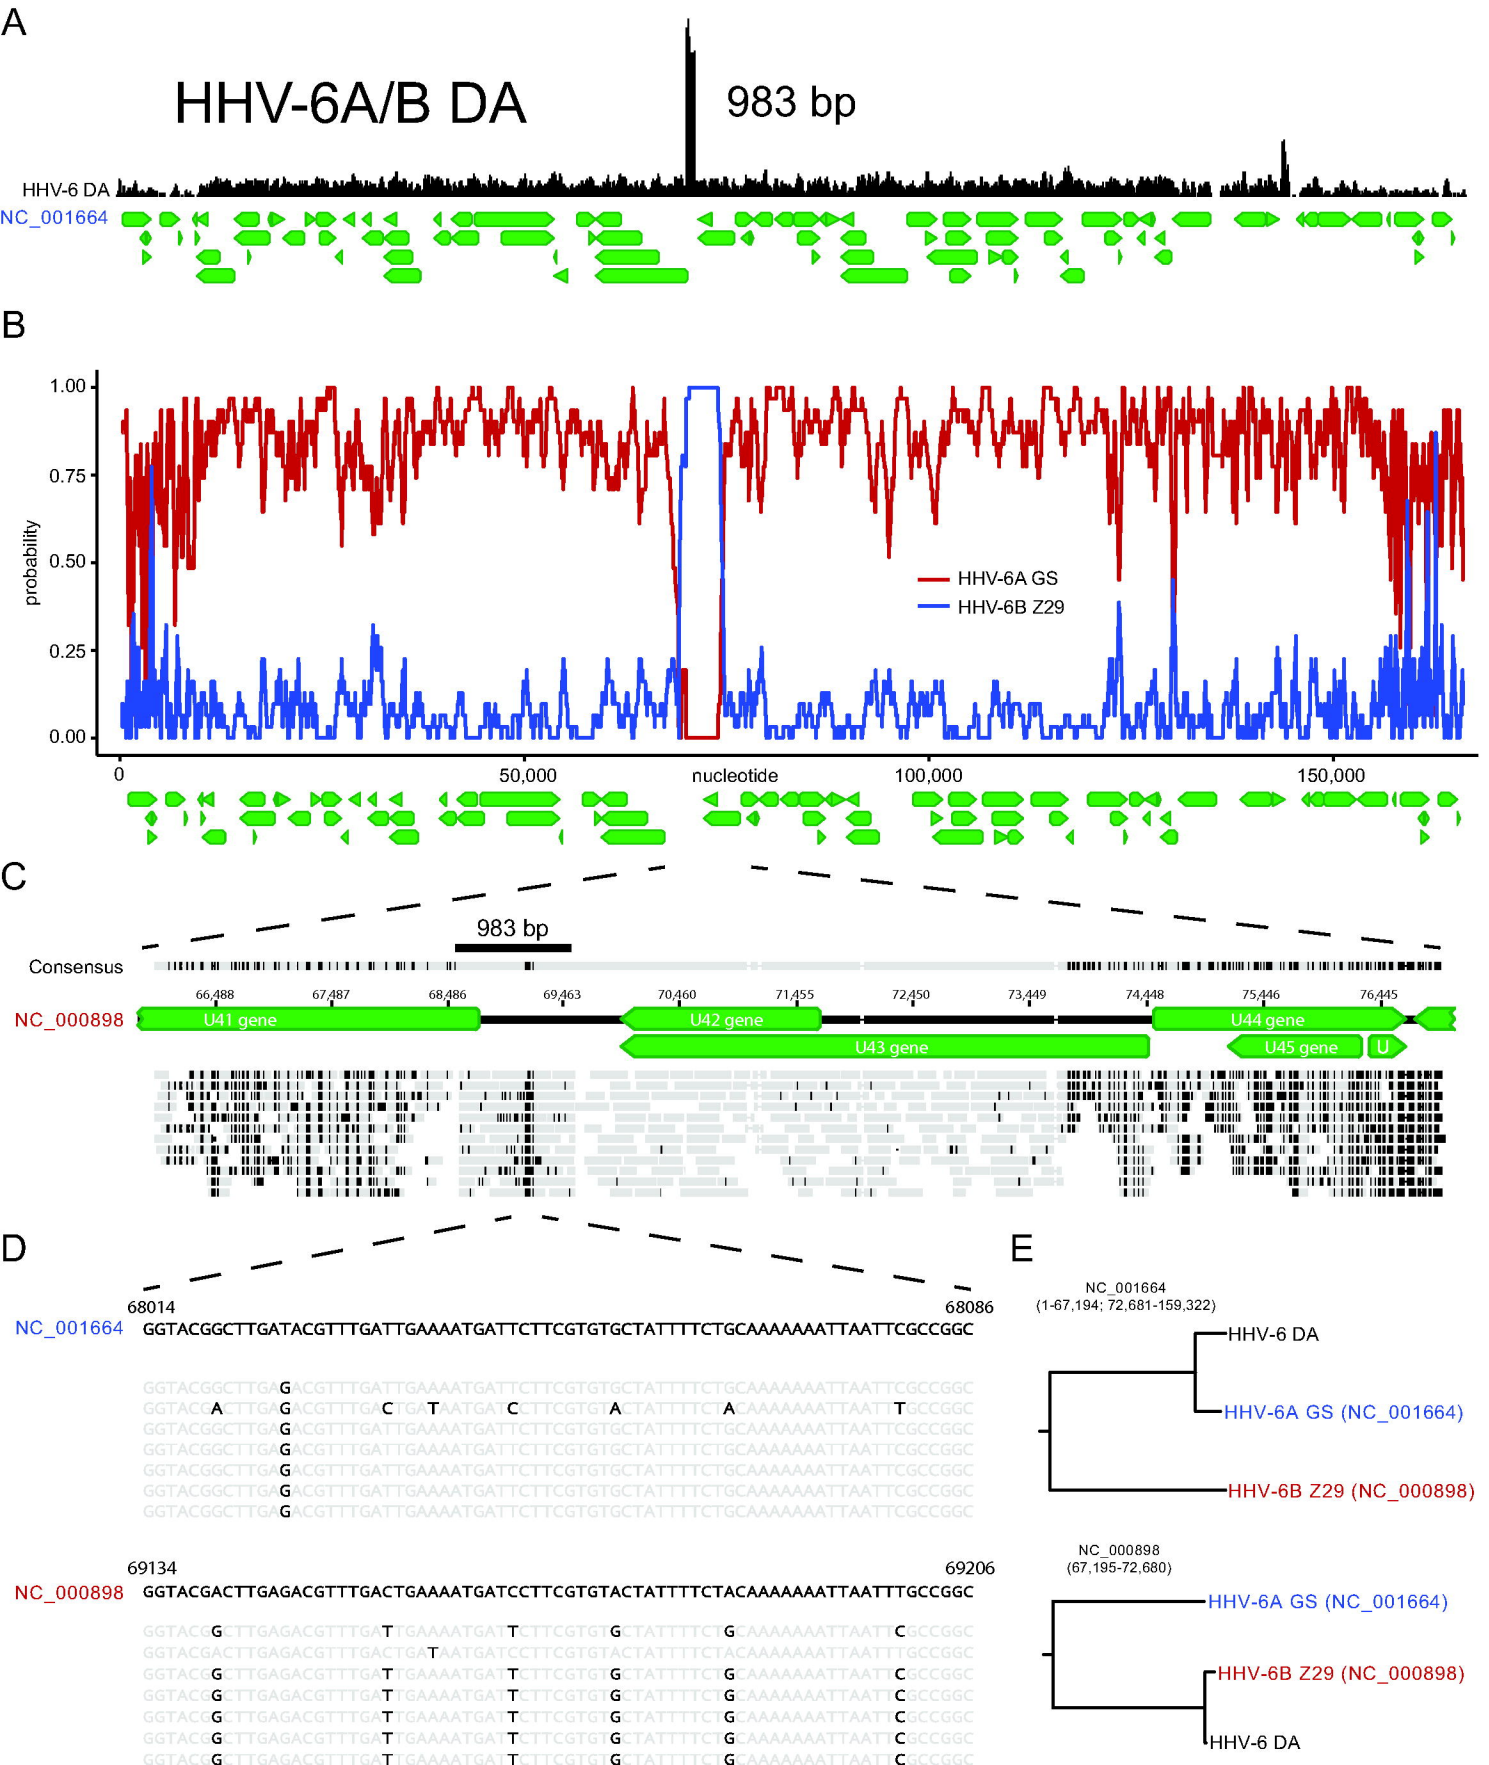

A

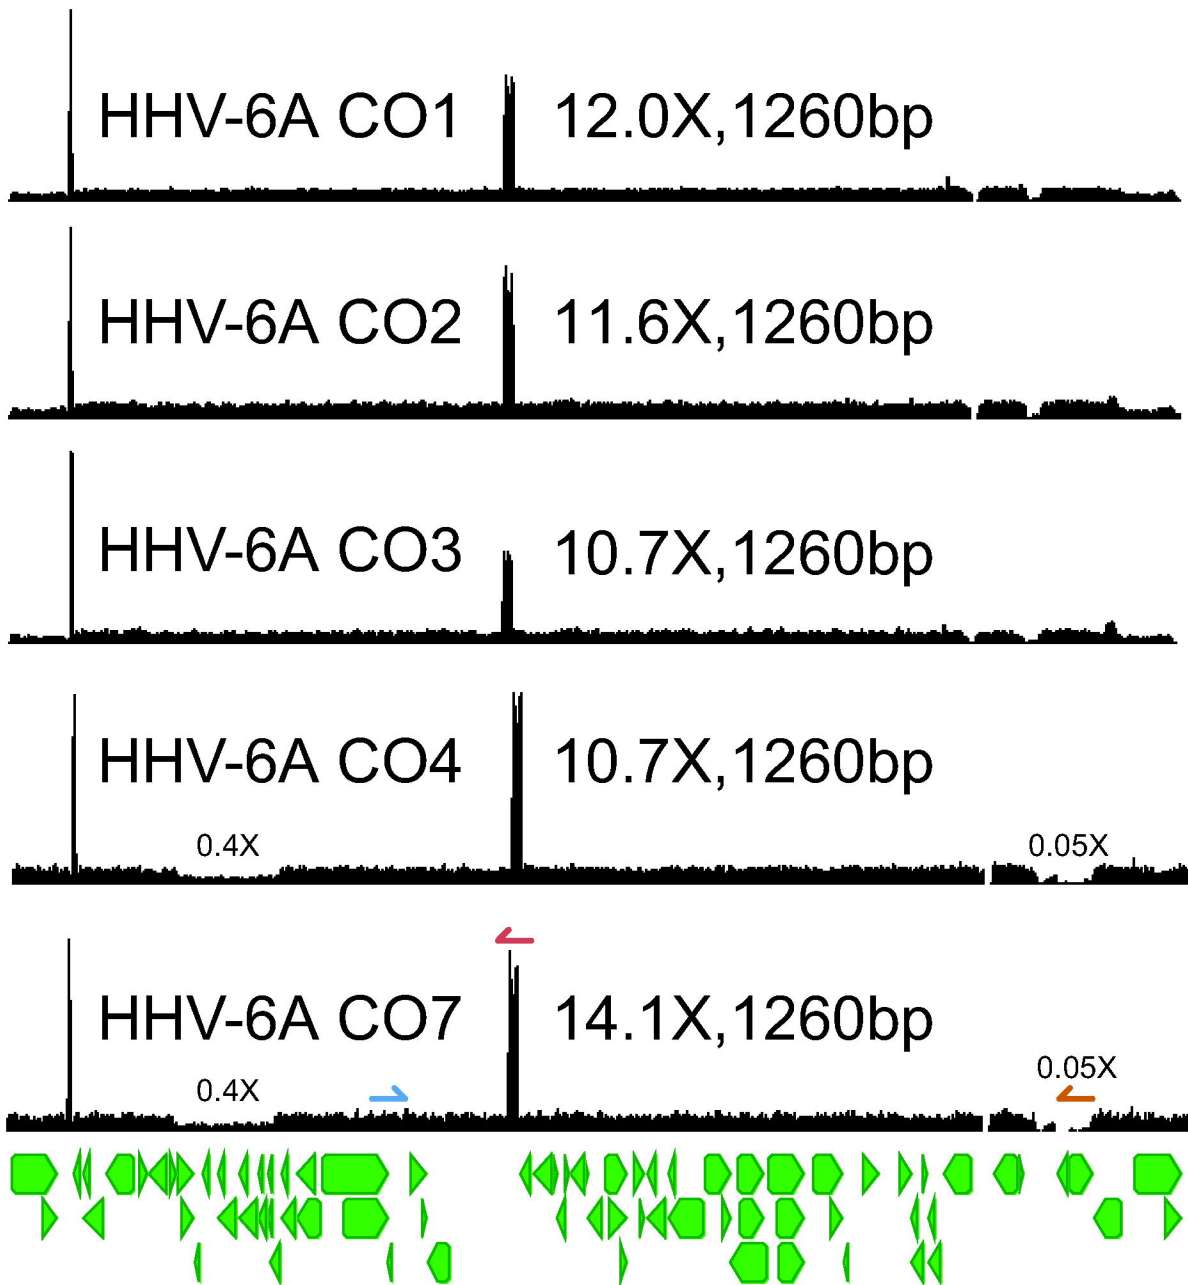

B

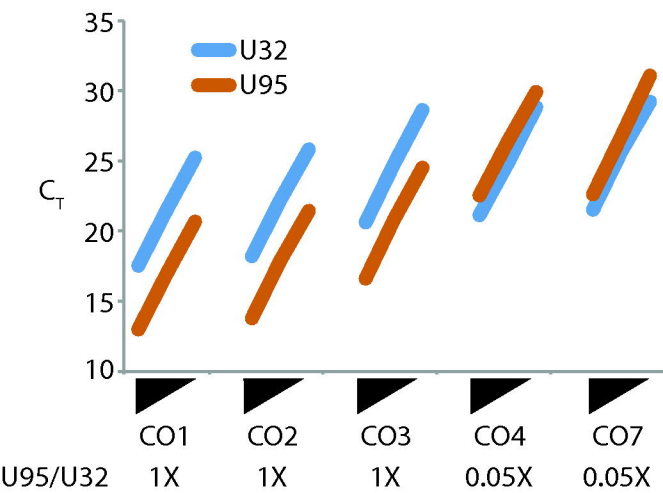

C

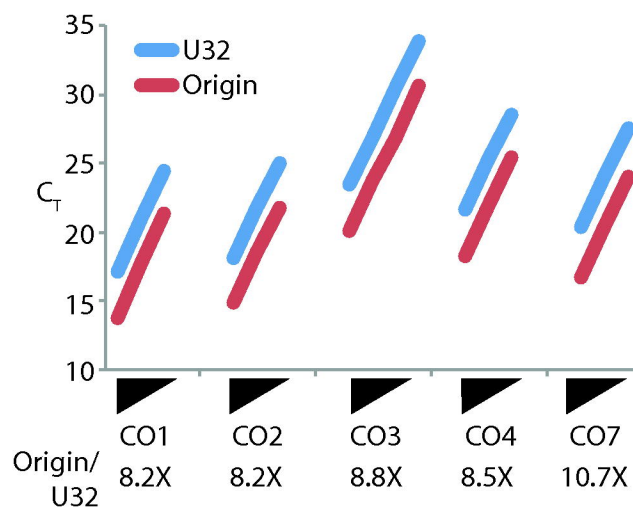

A

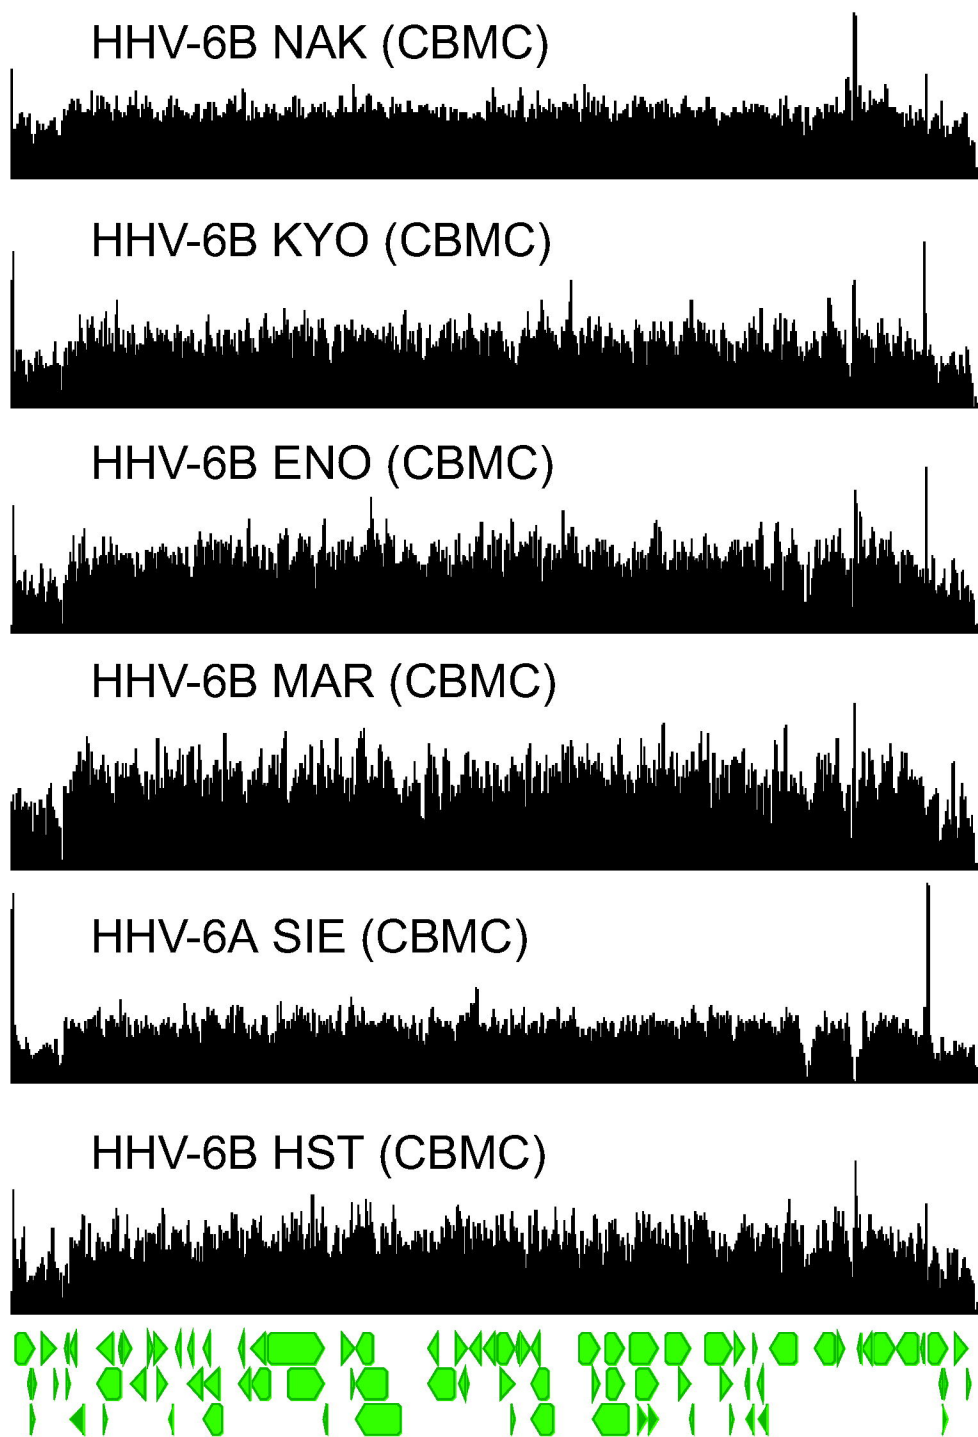

B

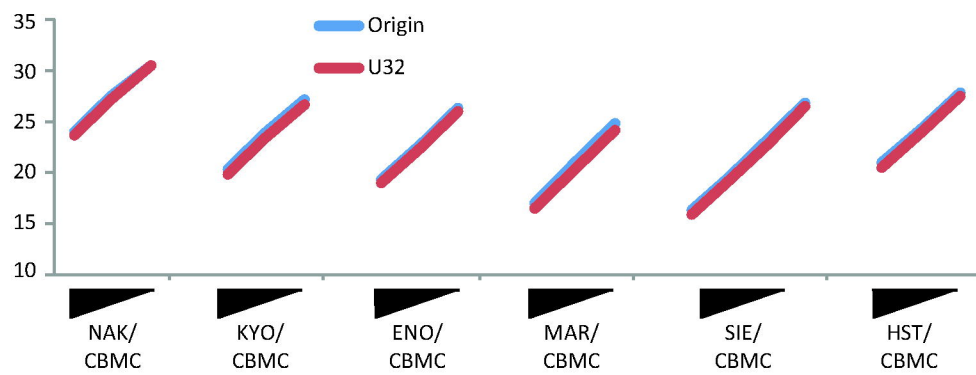

Source: https://www.biorxiv.org/content/10.1101/193805v1.full.pdf
